# Supplementary material
Source: Springer Nature journal article supplement (https://www.springerprofessional.de/resource/supplementary/13638_2013_1054_MOESM3_ESM.pdf/11898864)
Supplement: MOESM3 [file 11898864]

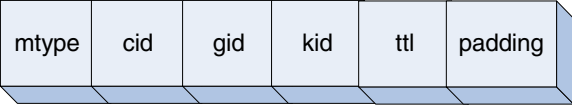

mtype: message type (TK)

cid: sequence number of route-update cycle

gid: identifier of the node generating the message

kid: number of the node (gid)'s children

ttl: Time to Live

padding: is variable in message size
